# Supplementary material for: Cross-metathesis of allylcarboranes with O-allylcyclodextrins
Source: publisher site journal article supplement (doi:10.3762/bjoc.6.126), 2010-11-23
Supplement: Additional file 1 [file 1860-5397-6-126-S1.pdf]

# **Supporting Information**

## **for**

### **Cross-metathesis of allylcarboranes with O-allylcyclodextrins**

Ivan Šnajdr<sup>1</sup>, Zbyněk Janoušek<sup>2</sup>, Jindřich Jindřich<sup>1</sup>, and Martin Kotora<sup>\*1</sup>

Address: <sup>1</sup>Department of Organic and Nuclear Chemistry, Faculty of Science, Charles University in Prague, Hlavova 8, 128 43 Praha 2, Czech Republic and <sup>2</sup>Institute of Inorganic Chemistry of the Academy of Science, v.v.i., Husinec-Řež 1001, 250 68 Řež, Czech Republic.

Email: Martin Kotora - kotora@natur.cuni.cz

\* Corresponding author

### **Experimental details and characterisation data of peracetylated cyclodextrins 2a, 2b and 2c.**

#### **General**

2<sup>l</sup>-O-allyl-β-cyclodextrin [1], and 3<sup>l</sup>-O-allyl-β-cyclodextrin [2], and 6<sup>l</sup>-O-allyl-β-cyclodextrin [3], were prepared according to the previously described procedures.

#### **General Procedure for Peracetylation of Allylcyclodextrins.**

Suspension of allylcyclodextrin (1 mmol) in acetic anhydride (0.47 mol) and triethylamine (0.36 mol) was stirred at 80 °C for 5 hours. After cooling to room

temperature, the reaction mixture was diluted by the addition of 0.5 M HCl (60 mL) and the extracted with  $\text{CHCl}_3$  ( $3 \times 50$  mL). The combined organic extracts were dried over anhydrous  $\text{Na}_2\text{SO}_4$ , concentrated in vacuo to give brown residue that was subsequently purified by column chromatography (silica gel, eluent:  $\text{CHCl}_3/\text{MeOH}$ , 100:1.)

**Per-O-acetyl-2<sup>l</sup>-O-allyl- $\beta$ -cyclodextrin 2a.** The compound was prepared from 2<sup>l</sup>-O-allyl- $\beta$ -cyclodextrin (1.92 g, 1.6 mmol). Column chromatography gave the title compound, 3.08 g (94%), as a white powder whose spectral data were in agreement with the published data [4].

**Per-O-acetyl-3<sup>l</sup>-O-allyl- $\beta$ -cyclodextrin 2b:** The compound was prepared from 3<sup>l</sup>-O-allyl- $\beta$ -cyclodextrin (0.48 g, 0.4 mmol). Column chromatography gave the title compound, 0.77 g (94%), as a white powder: m. p. 130.6 °C;  $[\alpha]_D^{20} = +114.2$  ( $c = 0.0026$  in MeOH); IR (KBr):  $\tilde{\nu} = 2953, 1747, 1368, 1237, 1044 \text{ cm}^{-1}$ ;  $^1\text{H}$  NMR (600 MHz,  $\text{CDCl}_3$ ):  $\delta = 5.91$  (ddt,  $J = 17.2, 10.2, 5.4 \text{ Hz}$ , 1 H, H-2'), 5.47 (dd,  $J = 9.0, 1.2 \text{ Hz}$ , 1 H, H-3), 5.35–5.23 (m, 6 H, 5  $\times$  H-3, H-3'b), 5.14–5.10 (m, 2 H, H-3'a, H-1), 5.08–5.01 (m, 6 H, 6  $\times$  H-1), 4.80–4.66 (m, 7 H, 7  $\times$  H-2), 4.58 (dd,  $J = 12.6, 1.2 \text{ Hz}$ , 1 H, H-6), 4.55–4.45 (m, 6 H, 5  $\times$  H-6, H-1'a), 4.36 (dd,  $J = 12.6, 4.2 \text{ Hz}$ , 1 H, H-6'), 4.29–4.02 (m, 14 H, H-1'b, 7  $\times$  H-6, 6  $\times$  H-5), 3.91–3.88 (m, 1 H, H-5'), 3.79 (dd,  $J = 9.0, 1.2 \text{ Hz}$ , 1 H, H-3<sup>l</sup>), 3.76–3.64 (m, 6 H, 6  $\times$  H-4), 3.56 (t,  $J = 9.0 \text{ Hz}$ , 1 H, H-4<sup>l</sup>), 2.12–1.97 (m, 60 H, 20  $\times$   $\text{CH}_3$ );  $^{13}\text{C}$  NMR (150 MHz,  $\text{CDCl}_3$ ):  $\delta = 170.87\text{--}169.31$  (20  $\times$  C=O), 135.49 (C-2'), 115.88 (C-3'), 97.58 (C-1<sup>l</sup>), 97.35 (C-1), 97.34 (C-1), 97.07 (C-1), 96.61 (C-1), 96.33 (C-1), 96.26 (C-1), 80.94 (C-4<sup>l</sup>), 77.51–69.24 (7  $\times$  C-2, 6  $\times$  C-3, 6  $\times$  C-4, 7  $\times$  C-5), 77.43 (C-3<sup>l</sup>), 74.71 (C-1'), 62.40 (C-6<sup>l</sup>), 62.72–62.33 (6  $\times$  C-6),

21.12–20.71 (20 × CH<sub>3</sub>); MS (EI, *m/z* (rel.%)): 2038.4 (100), 1851.3 (18), 1030.8 (62), 937.8 (10).

**Per-O-acetyl-6<sup>l</sup>-O-allyl-β-cyclodextrin 2c.** The compound was prepared from 6<sup>l</sup>-O-allyl-β-cyclodextrin (8 g, 6.8 mmol). Column chromatography gave the title compound, 13.16 g (96%), as a white powder whose spectral data were in agreement with the published data [1].

## References

1. Jindřich, J.; Pitha, J.; Lindberg, B.; Seffers, P.; Harata, K. *Carbohydr. Res.* **1995**, 266, 75–80. doi:[10.1016/0008-6215\(94\)00251-A](https://doi.org/10.1016/0008-6215(94)00251-A)
2. Masurier, N.; Estour, F.; Lefèvre, B.; Brasme, B.; Masson, P.; Lafont, O. *Carbohydr. Res.* **2006**, 341, 935–940. doi:[10.1016/j.carres.2006.02.012](https://doi.org/10.1016/j.carres.2006.02.012)
3. Jindřich, J.; Tišlerová, I. *J. Org. Chem.* **2005**, 70, 9054–9055. doi:[10.1021/jo051339c](https://doi.org/10.1021/jo051339c)
4. Řezanka, M.; Eignerová, B.; Jindřich, J.; Katora, K. *Eur. J. Org. Chem.* **2010**, 6256–6262. doi: [10.1002/ejoc.201000807](https://doi.org/10.1002/ejoc.201000807)
